# Supplementary material
Source: publisher figshare collection journal article supplement (https://sage.figshare.com/ndownloader/files/22279458)
Supplement: Supplementary file 1 [file 22279458]

**Table 1 Supplement.** Ranking of Per Capita Total Capital Outlay in 100 American Central Cities (Average 1988-2012, 2012 Dollar).

| City | State | Per Capita Total Capital Outlay | City | State | Per Capita Total Capital Outlay |
| --- | --- | --- | --- | --- | --- |
| Atlanta | Georgia | $1,565 | Columbia | South Carolina | $605 |
| Orlando | Florida | $1,559 | Nashville | Tennessee | $604 |
| Denver | Colorado | $1,345 | Akron | Ohio | $603 |
| San Francisco | California | $1,241 | Louisville | Kentucky | $598 |
| Seattle | Washington | $1,183 | Bakersfield | California | $579 |
| Salt Lake | Utah | $1,154 | Oklahoma City | Oklahoma | $578 |
| Las Vegas | Nevada | $1,150 | Columbus | Ohio | $573 |
| New Haven | Connecticut | $1,103 | Shreveport | Louisiana | $570 |
| New York | New York | $1,052 | Boston | Massachusetts | $569 |
| Cincinnati | Ohio | $1,033 | Tucson | Arizona | $565 |
| Charlotte | North Carolina | $995 | Wichita | Kansas | $564 |
| Minneapolis | Minnesota | $981 | Lincoln | Nebraska | $563 |
| Tampa | Florida | $956 | Rochester | New York | $561 |
| Anchorage | Alaska | $928 | Richmond | Virginia | $554 |
| Phoenix | Arizona | $921 | Chattanooga | Tennessee | $552 |
| Indianapolis | Indiana | $904 | New Orleans | Louisiana | $551 |
| Sacramento | California | $891 | Toledo | Ohio | $549 |
| Fargo | North Dakota | $881 | Buffalo | New York | $540 |
| Chicago | Illinois | $880 | Portland | Maine | $535 |
| Dallas | Texas | $872 | Syracuse | New York | $530 |
| San Jose | California | $858 | Memphis | Tennessee | $514 |
| Reno | Nevada | $845 | Philadelphia | Pennsylvania | $513 |
| Miami | Florida | $842 | Burlington | Vermont | $511 |
| Raleigh | North Carolina | $805 | Omaha | Nebraska | $506 |
| St. Louis | Missouri | $790 | Virginia Beach | Virginia | $503 |
| Des Moines | Iowa | $785 | Fresno | California | $502 |
| Houston | Texas | $782 | Mobile | Alabama | $491 |
| Detroit | Michigan | $758 | Boise | Idaho | $484 |
| San Diego | California | $756 | Durham | North Carolina | $483 |
| Jacksonville | Florida | $751 | Stockton | California | $480 |
| Cheyenne | Wyoming | $733 | El Paso | Texas | $479 |
| Knoxville | Tennessee | $730 | Modesto | California | $478 |
| Wilmington | Delaware | $720 | Corpus Christi | Texas | $457 |
| Birmingham | Alabama | $713 | Greensboro | North Carolina | $452 |
| Albuquerque | New Mexico | $707 | Manchester | New Hampshire | $451 |
| Riverside | California | $706 | Little Rock | Arkansas | $437 |
| Los Angeles | California | $702 | Grand Rapids | Michigan | $431 |
| Baltimore | Maryland | $694 | Jackson | Mississippi | $426 |
| Austin | Texas | $680 | Worcester | Massachusetts | $403 |
| Portland | Oregon | $679 | Bridgeport | Connecticut | $385 |
| Milwaukee | Wisconsin | $675 | Charleston | West Virginia | $384 |
| Cleveland | Ohio | $674 | Kansas City | Kansas | $378 |
| Colorado Springs | Colorado | $673 | Baton Rouge | Louisiana | $362 |
| Dayton | Ohio | $670 | Madison | Wisconsin | $357 |
| Pittsburgh | Pennsylvania | $652 | Lexington | Kentucky | $351 |
| Spokane | Washington | $651 | Fort Wayne | Indiana | $347 |
| Hartford | Connecticut | $650 | Billings | Montana | $331 |
| Charleston | South Carolina | $647 | Montgomery | Alabama | $320 |
| Tulsa | Oklahoma | $646 | Springfield | Massachusetts | $250 |
| San Antonio | Texas | $610 | Providence | Rhode Island | $241 |
